***HaHB11* transformed maize has improved yield under waterlogging and defoliation in control and field conditions**

Jesica Raineri<sup>a</sup>, Luciano Caraballo<sup>a#</sup>, Nicolás Rigalli<sup>b#</sup>, Margarita Portapila<sup>b</sup>, María Elena Otegui<sup>c</sup>, Raquel Lía Chan<sup>a</sup>

<sup>a</sup> Instituto de Agrobiotecnología del Litoral, Universidad Nacional del Litoral – CONICET, Facultad de Bioquímica y Ciencias Biológicas, Colectora Ruta Nacional 168 km 0, Santa Fe, Argentina.

<sup>b</sup> CIFASIS, Universidad Nacional de Rosario - CONICET

<sup>c</sup> CONICET- INTA – FAUBA. Estación experimental Pergamino, Facultad de Agronomía Universidad de Buenos Aires, Buenos Aires, Argentina.

# These authors equally contributed to this work

**Short title:** *Maize HaHB11 plants tolerate waterlogging*

**Corresponding author:** Raquel Lía Chan Instituto de Agrobiotecnología del Litoral CONICET-UNL, Centro Científico Tecnológico CONICET Santa Fe, Colectora Ruta Nacional Nº 168 km. 0, Paraje El Pozo. 3000 Santa Fe – Argentina. E-mail: [rchan@fcb.unl.edu.ar](mailto:rchan@fcb.unl.edu.ar). Tel/Fax: 54-342-4511370 extension: 5018

**One sentence summary:** Phenotyping and big data analyses indicate that the transcription factor HaHB11 confers waterlogging and defoliation tolerance, and increased yield to maize lines and hybrids in all tested conditions.

**Authors' contributions**

Conceived the experiments: JR, MEO, MP, and RLC. JR performed most of the experiments and the illustrations. LC and JR carried out the greenhouse assays. NR and MP performed the spectral reflectance assays and big data analyses and wrote the corresponding items.

Conceived and wrote the paper: RLC. JR and MP contributed with the writing. MEO deeply revised and discussed the manuscript. All the authors approved it.

### **Funding information**

This work was supported by Agencia Nacional de Promoción Científica y Tecnológica (PICT 2015-2176), and CONICET. LC is an undergraduate student at Universidad Nacional del Litoral. JR and NR are Fellows of CONICET, MEO and RLC are career members of the same institution. MP is Professor at the National University of Rosario.

1 **Abstract**

2 HaHB11 is a sunflower transcription factor previously described as conferring improved  
3 yield to maize hybrids and lines. Here we report that transgenic *HaHB11* maize lines  
4 exhibited a better performance under waterlogging, both in greenhouse and field trials  
5 carried out during three growth cycles. One of these trials was particularly affected by a  
6 strong storm during flowering, causing severe defoliation. Controlled defoliation assays  
7 indicated that the transgenic genotypes were able to set more grains than controls. Hybrids  
8 were generated by crossing B73 *HaHB11* lines with the contrasting Mo17 lines and tested in  
9 the field. These hybrids exhibited the same beneficial traits as the parental lines when  
10 compared with their respective controls. Waterlogging tolerance occurred via the root  
11 architecture improvement, including more xylem vessels, reduced tissue damage, less  
12 superoxide accumulation, and altered carbohydrate metabolism compared to controls.  
13 Multivariate analyses corroborated the robustness of the differential traits observed.  
14 Furthermore, canopy spectral reflectance data, computing 29 vegetation indices associated  
15 with biomass, chlorophyll, and abiotic stress, helped to identify genotypes as well as their  
16 growing conditions. Altogether the results reported here indicate that this sunflower gene  
17 constitutes a suitable tool to improve maize plants for environments prone to waterlogging  
18 and/or wind defoliation.

## 19 **Introduction**

20 Maize, rice, and wheat are the crops with the largest production worldwide, providing 60%  
21 of the global caloric human intake (FAO 2021,  
22 <http://www.fao.org/3/u8480e/u8480e07.htm>). Maize is used for human nutrition but also  
23 for ethanol synthesis and animal feeding. It is a C4 summer crop grown as single-cross (i.e.  
24 F1) hybrids presenting high heterosis expression conducive to high grain yield and large  
25 biomass production (Duvik, 2005). The improved yield observed in modern hybrids was  
26 mainly attributed to enhanced leaf area duration and post-silking crop growth (Rajcan and  
27 Tollenaar, 1999), as well as to improved radiation and water use efficiencies (Curin *et al.*,  
28 2020). Despite these positive traits, maize is remarkably vulnerable to stress conditions  
29 during the critical period of the kernel set (Cerrudo *et al.*, 2013) due to the dominated  
30 condition within the plant of the grain-bearing organ (the ear) respect to the pollen-  
31 producing organ (the tassel). Therefore, most breeding efforts have focused on enhancing  
32 abiotic stress tolerance (Chen *et al.*, 2016; Tollenaar and Wu, 1999) and reducing apical  
33 dominance (Duvik *et al.*, 2004; Tollenaar and Wu, 1999).

34 Although the great efforts devoted to maize breeding, the target production environments  
35 of this species are exposed continuously to abiotic stress that penalizes grain yields  
36 (Pedersen *et al.*, 2017). Among abiotic stress factors and due to global warming, the  
37 incidence of floods that expose crops to waterlogging is rising every decade worldwide  
38 (Pedersen *et al.*, 2017). Flooding events predominate in several areas of the main maize  
39 cropping regions. For instance, the May-2018 to April-2019 was the wettest 12-month  
40 period in 124 years of records in the United States (NASA, 2019), producing a marked delay  
41 in maize sowing date due to soggy soils (USDA, 2019) and a decline in grain yield (FAO,  
42 2019). According to the projection based on multiple climate models, this scenario will not  
43 get better; flooding events will increase in most parts of the world during this century  
44 (Hirabayashi *et al.*, 2021). Global warming also impacts the severity of storms and hail  
45 incidence, indicating a significant increase in such phenomena. Strong winds and hail  
46 produce different degrees of damage to maize crops depending upon the defoliation  
47 intensity and the opportunity of the event (Battaglia *et al.*, 2019).

48 The adaptation of rice to flooding has been deeply studied, being this species resilient to  
49 anaerobic soil conditions. The investigation about this harmful stress was divided into that  
50 provoked by waterlogging (root system inundation) and the generated by submergence of

51 the aerial system (Bailey-Serres *et al.*, 2012a; Voeselek *et al.*, 2015). Waterlogging causes  
52 quick soil O<sub>2</sub> depletion because rhizosphere microbes rapidly consume it, provoking changes  
53 in the fixation of nitrogen and other nutrients. Another effect of waterlogging is a decrease  
54 in soil pH, that increases toxic metals and phosphorous solubility (Setter *et al.*, 2009; Bailey-  
55 Serres and Voeselek, 2008). In these conditions, plants become unable to cope with  
56 evaporative demand, reducing gas exchange and growth (Bramley *et al.*, 2007). Gas  
57 diffusion is reduced 10<sup>4</sup>-fold, limiting not only oxygen for aerobic respiration but also the  
58 CO<sub>2</sub> needed for photosynthesis (Abiko *et al.*, 2012).

59 When plants sense these environmental changes, they trigger molecular signaling pathways  
60 to cope with the stress, including specific modulation of gene expression and hormone  
61 homeostasis (Voeselek and Bailey-Serres, 2015). Among the hormones involved in plant  
62 response to flooding, ethylene plays a key role (Bailey-Serres *et al.*, 2012b; Bailey-Serres and  
63 Voeselek, 2010; Loreti *et al.*, 2016; Sasidharan *et al.*, 2018; Voeselek and Sasidharan,  
64 2013). Ethylene accumulates in the cells, eliciting the formation of reactive oxygen species,  
65 which play a dual role as signaling molecules and causing oxidative stress damage  
66 (Sasidharan *et al.*, 2018; Yamauchi *et al.*, 2018).

67 Adaptation to waterlogging stress also involves the fine-tuning of several genes, mostly  
68 associated with carbohydrate transport, anaerobic metabolism, cell wall remodeling, and  
69 detoxification. Among these genes, there are those encoding the enzymes invertase (*INV*);  
70 glucose-6-phosphate isomerase (*G6PI*); glyceraldehyde-3-phosphate-dehydrogenase  
71 (*GAPDH*); phosphoglycerate kinase (*PGK*), and alcohol dehydrogenase (*ADH*) (Arora *et al.*,  
72 2017; Du *et al.*, 2017; Zou *et al.*, 2010). The root system is the most affected by  
73 waterlogging, and the adaptive changes include the generation of new adventitious roots  
74 and aerenchyma constituting a barrier to radial oxygen loss (Abiko *et al.*, 2012, Loreti *et al.*,  
75 2016; Yamauchi *et al.*, 2018).

76 Regarding defoliation stress, it is caused by varied factors such as storms, hail, leaf diseases,  
77 and herbivore attacks, causing all them a total or partial reduction in the leaf area of plants,  
78 leading frequently to reduce light interception, and consequently less biomass production  
79 through photosynthesis. In early defoliation events, the grain yield penalization is usually  
80 low provided the apical meristem is not injured causing plant death and stand reduction  
81 (Battaglia *et al.*, 2019). By contrast, partial defoliation during the critical period for kernel  
82 set may decrease seed yield dramatically (Battaglia *et al.*, 2019), depending upon the

83 reduction caused in plant growth rate (Andrade *et al.*, 1999). The extent of yield  
84 penalization due to defoliation during the active grain-filling period will depend upon the  
85 reduction caused to the source-sink ratio during this stage (Borrás *et al.*, 2004).

86 Environmental factors are perceived by plants that display signal transduction pathways  
87 resulting in the degradation of superfluous biomolecules and the synthesis of others needed  
88 to deal with stress. In the first steps of such molecular responses, transcription factors (TFs)  
89 play a crucial role as master switches able to activate or repress entire metabolic pathways.  
90 In plants, there are numerous TFs (more than 1500 in the model *Arabidopsis*) classified in  
91 families, mainly according to the conserved DNA binding domain. Among these families, the  
92 homeodomain-leucine zipper (HD-Zip) is unique to this kingdom and was associated with  
93 abiotic stress responses (Perotti *et al.*, 2017). Members of this family present high  
94 conservation of the HD-Zip domain, and the sequencing of whole genomes of different  
95 species revealed other uncharacterized functional motifs located in the N- and C- termini of  
96 these proteins (Arce *et al.*, 2011). Notably, in sunflower and other Asteraceae species, there  
97 are HD-Zip I proteins exhibiting distinctive carboxy-termini. Among these divergent  
98 members, there is HaHB4, which confers tolerance to drought in wheat and soybean plants  
99 (González *et al.*, 2020), and HaHB11, which enhanced yield in B73 lines and Hill hybrids  
100 (Raineri *et al.*, 2019). HaHB11 also conferred flooding tolerance to *Arabidopsis* plants, both  
101 to waterlogging and submergence (Cabello *et al.*, 2016).

102 *HaHB11* maize plants were assessed in greenhouse and field trials during three growing  
103 seasons. Phenotyping was carried out by measuring different traits conducive to  
104 characterize plant and crop growth, such as stem width and height, leaf area, total biomass,  
105 ASI (anthesis-silking interval), light interception, and grain yield (Raineri *et al.*, 2019).

106 In this work, we describe greenhouse and field trials revealing that maize plants expressing  
107 the sunflower TF HaHB11 exhibit enhanced tolerance to waterlogging. Moreover, during  
108 one of these trials, a strong storm that provoked severe defoliation revealed that transgenic  
109 plants were able to withstand the negative effects of defoliation better than the non-  
110 transgenic ones. This response was corroborated in subsequent controlled assays. We  
111 obtained new hybrids, using transgenic and non-transgenic B73 lines crossed to the  
112 contrasting MO17 parental. Transgenic hybrids had increased yield compared to the  
113 controls. Finally, non-destructive spectral analysis (remote-sensing) along the cycle of field-  
114 grown crops allowed distinguishing controls from transgenic genotypes.

115 **Results**

116 *HaHB11* transgenic maize plants exhibit increased tolerance to waterlogging compared with  
117 controls in greenhouse and field assays

118 Although the enormous differences between the sunflower (the species from which *HaHB11*  
119 was isolated) and the model plant *Arabidopsis*, the evolutionary distance between  
120 *Arabidopsis* and maize is even greater. Hence, we wondered if the waterlogging tolerance,  
121 conferred by *HaHB11* to *Arabidopsis*, was conserved in maize.

122 Firstly, we carried out waterlogging assays with plants grown on pots filled with sand in the  
123 greenhouse. Several characteristics were assessed in two independent transgenic lines and  
124 null segregants, used as controls (B73). During the treatment period, transgenic plants  
125 developed longer roots with increased biomass and achieved a larger leaf area than controls  
126 (Figures 1A, 1B, 1D, 1E). Moreover, compared with the null segregants, the leaves of  
127 *HaHB11* plants showed higher stomatal conductance (Figure 1C). Overall, these results  
128 suggest an increased waterlogging tolerance of *HaHB11* plants.

129 In the field, waterlogging usually persists for several days but not along all the life cycle.  
130 Hence, after the stress treatment, plants were placed into larger pots and were allowed to  
131 recover and grow in normal conditions. At the end of the life cycle, *HaHB11* transgenic  
132 plants developed larger leaf and stem areas and an extended period of leaf greenness and  
133 concurrent delayed senescence (Figures 1F-1I). These trends were accompanied by  
134 increased biomass (Figure 1H). Moreover, such plants had more nodal roots (Figure 1J) and  
135 enhanced grain number (Figure 1L), whereas individual grain weight (Figure 1K) did not  
136 differ between genotypes. Described traits explained the increased grain yield (Figure 1M)  
137 and healthy aspect of the produced kernels (Figure 1N). Notably, most differential traits  
138 between controls and transgenics, observed in normal conditions trials (Raineri *et al.*, 2019)  
139 were maintained after this stress treatment.

FIGURE 1

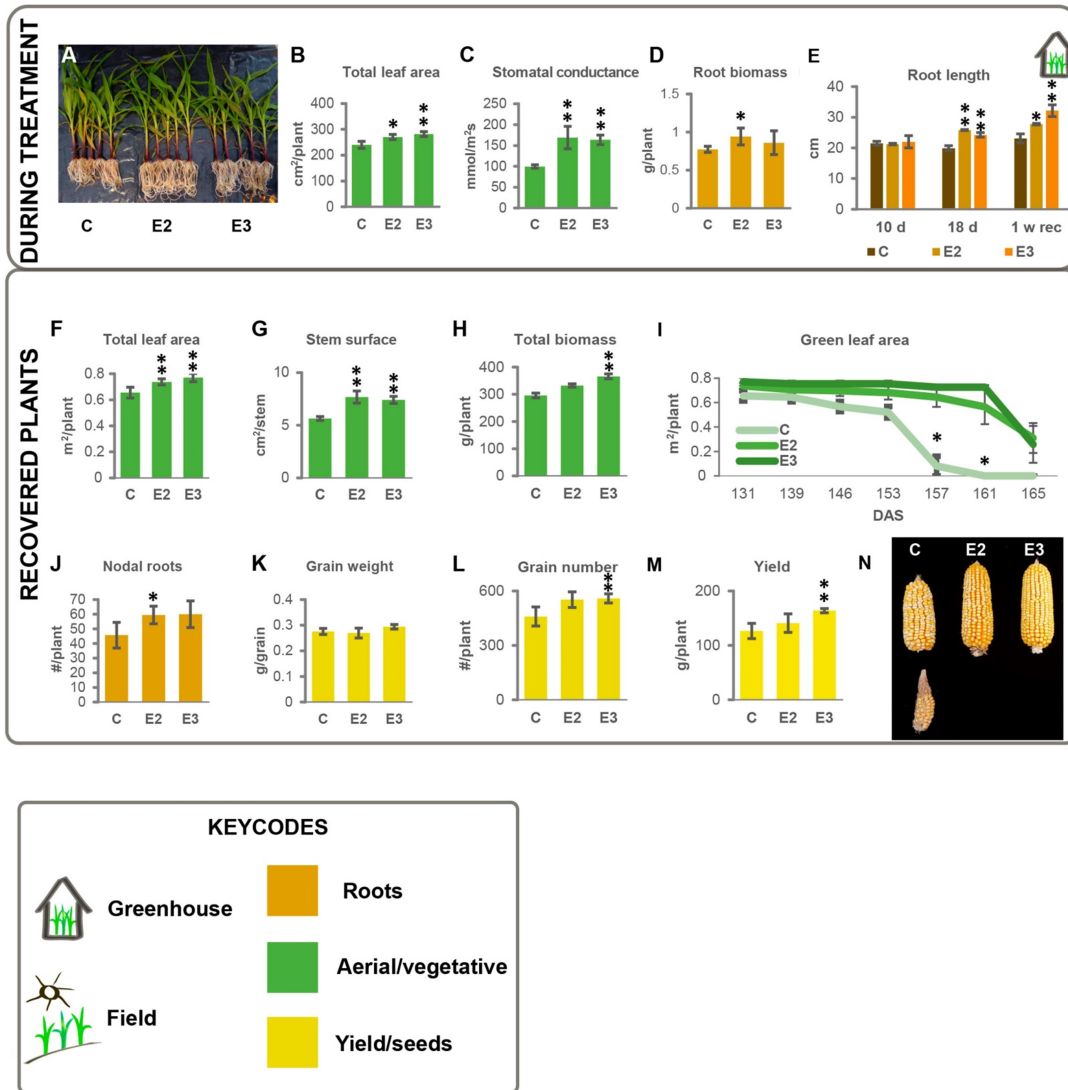

Figure 1. Transgenic plants expressing *HaHB11* exhibit enhanced waterlogging tolerance compared with their B73 controls in the greenhouse

Illustrative picture of maize plants subjected to waterlogging during 18 days (A). Total leaf area (B) and root biomass (D) after 18 days of waterlogging. Stomatal conductance after 7 days of treatment (C). Root length after 10 and 18 days of waterlogging treatment plus 1 week of recovery (E). Total leaf area at silking (F), stem surface (G), total biomass (H), green leaf area (I), number of nodal roots (J), grain weight (K), grain number (L) and yield (M). Illustrative pictures of cobs at harvest of control (C), and transgenic events (E2 and E3) in B73 background (N). Data represent means  $\pm$  SEM of at least 4 biological replicates. Asterisks indicate significant differences respect to the control genotype (\* for  $P < 0.05$  and \*\* for  $P < 0.01$ ). Bottom: codes used in all the illustrations.



140 Even though greenhouse assays gave us a preliminary idea about the performance of  
141 *HaHB11* transgenic plants after a waterlogging episode, field-grown maize is exposed to a  
142 combination of environmental conditions (irradiance level, wind, evaporative demand, etc.)  
143 that may modify results obtained in the greenhouse. However, the generation of  
144 waterlogging conditions in the field is rather difficult. Hence, we designed a mixed test to  
145 evaluate the performance of waterlogged maize (see Methods). Waterlogging was applied  
146 for 14 days to V4 plants grown in a large pot in the field (Figure 2A). After that, plants were  
147 transferred to soil and grown in standard conditions until harvest (Figure 2A). To further  
148 understand the distinctive root phenotype observed in the greenhouse (Figures 1A, 1D-E),  
149 we performed and analyzed transversal cuts. This study indicated that the transgenic  
150 genotype developed more xylem vessels than controls (Figures 2B, 2C). Similar to the  
151 greenhouse scenario, *HaHB11* plants exhibited delayed senescence and increased  
152 chlorophyll content than controls (Figures 2D, 2E, 2F), and developed more nodal roots,  
153 wider stems, and total aerial biomass (Figures 2G, 2H, 2I), indicating a better recovery from  
154 waterlogging than their control counterparts. Regarding grain yield determination,  
155 transgenic plants partitioned more biomass into grains (Figure 2J), showing increased yield,  
156 explained by an improved grain setting (Figures 2L, 2K).

FIGURE 2

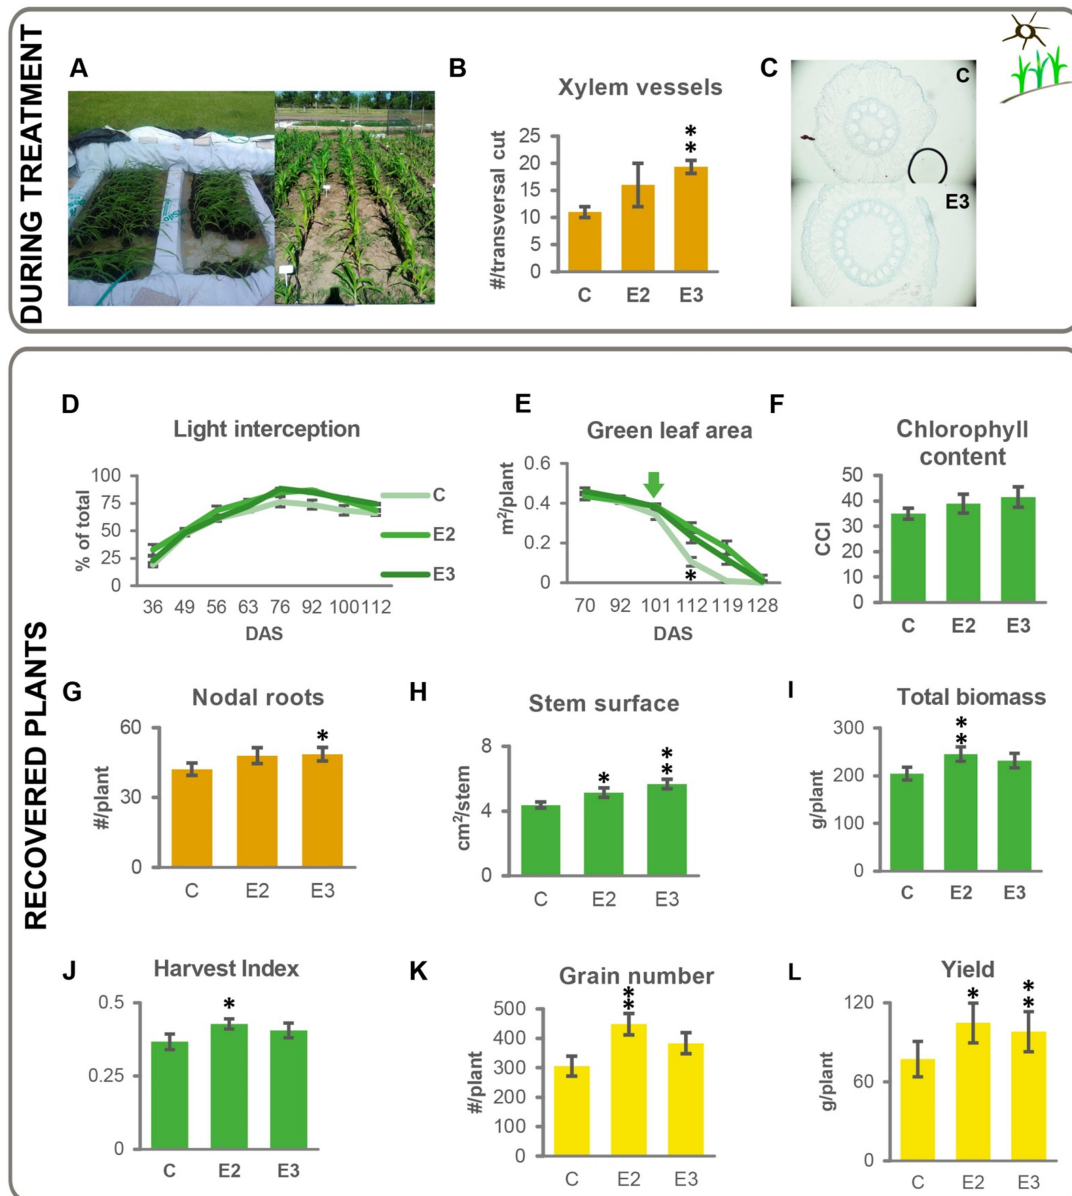

**Figure 2. Field-grown transgenic plants expressing *HaHB11* tolerate better waterlogging than their B73 controls**

Illustrative picture of waterlogging treatment in the field (left, A) and plants placed on soil after treatment (right, A). Xylem vessels per transversal root cuts (B) and image of the stained cross sections of control and E3 transgenic plants (C), after 2 weeks of waterlogging. Light interception and green leaf area during the life cycle (D, E). Ear leaf green leaf index, 100 days after sowing measured as chlorophyll/carotenoid index (CCI, F). Nodal roots number (G), stem surface (H), total biomass (I), harvest index (J), grain number and yield (K, L) of plants at harvest. Data represent means  $\pm$  SEM of at least 3 biological replicates. Asterisks indicate significant differences respect to the control genotype (\* for  $P < 0.05$  and \*\* for  $P < 0.01$ ).

157 *HaHB11* transgenic maize plants withstood the hardship of an unexpected severe  
158 windstorm and exhibited improved performance than controls under defoliation

159 During the third waterlogging assay in the field, a severe windstorm with gusts of 107 km h<sup>-1</sup>  
160 hit the crop eleven days after silking, when still in the critical period for grain setting. Plants  
161 that were not killed and remained standing were completely defoliated with leaves  
162 preserving only their midribs (Supplementary Figure S1). Surprisingly, transgenic *HaHB11*  
163 plants accumulated more biomass and doubled grain yield of controls at maturity  
164 (Supplementary Figure S1). To confirm this serendipitous finding, we performed a  
165 greenhouse assay. We manually defoliated the plants 11 days after silking with similar  
166 results to those of the field (Supplementary Figure S2). These results strongly suggested that  
167 transgenic plants can withstand defoliation during seed filling better than the controls, and  
168 therefore reduced the associated penalization to grain yield.

169

170 Is *HaHB11* able to improve the already enhanced growth promoted by heterosis in F1 maize  
171 hybrids?

172 Original transgenic maize plants were obtained in the Hill hybrid (a cross between the A188  
173 and B73 inbreds) of poor performance compared with commercial hybrids. Hence, the  
174 progeny of Hill was backcrossed to B73 to recover the phenotype of this inbred line and  
175 reduce phenotypic segregation (Raineri *et al.*, 2019). The beneficial effect of *HaHB11* on  
176 several agronomic traits was detected, albeit at different extents, dependent on the  
177 heterozygosity levels.

178 Heterosis in maize usually increases yields around 72-254% under no-stress conditions  
179 (Duvik, 2005; Munaro *et al.*, 2011). Thus, we wondered if *HaHB11* would be able to maintain  
180 the previously described beneficial traits when expressed in an improved hybrid  
181 background, or the benefits conferred by the transgene may be masked due to the  
182 enhanced heterosis conferred by the cross of inbreds representative of contrasting  
183 heterotic groups. We performed crosses between B73 (transgenic and control plants) and  
184 the Mo17 public lines. The former belongs to the Reid Yellow Dent Group and the latter to  
185 the Lancaster Sure Crop Group, and crosses between them have been widely studied  
186 (Troyer, 1999). In greenhouse assays, carried out in normal growth conditions, transgenic F1  
187 hybrids, from the B73 × Mo17 cross, accumulated more biomass, and exhibited delayed  
188 senescence (Figures 3A, 3B, 3C). Moreover, similar to the results obtained with lines,

189 transgenic hybrids achieved significant higher grain number and yield than controls (Figures  
 190 3D, 3E). These results strongly suggested that *HaHB11* expression could still improve hybrid  
 191 plants, at least in standard conditions.

**FIGURE 3**

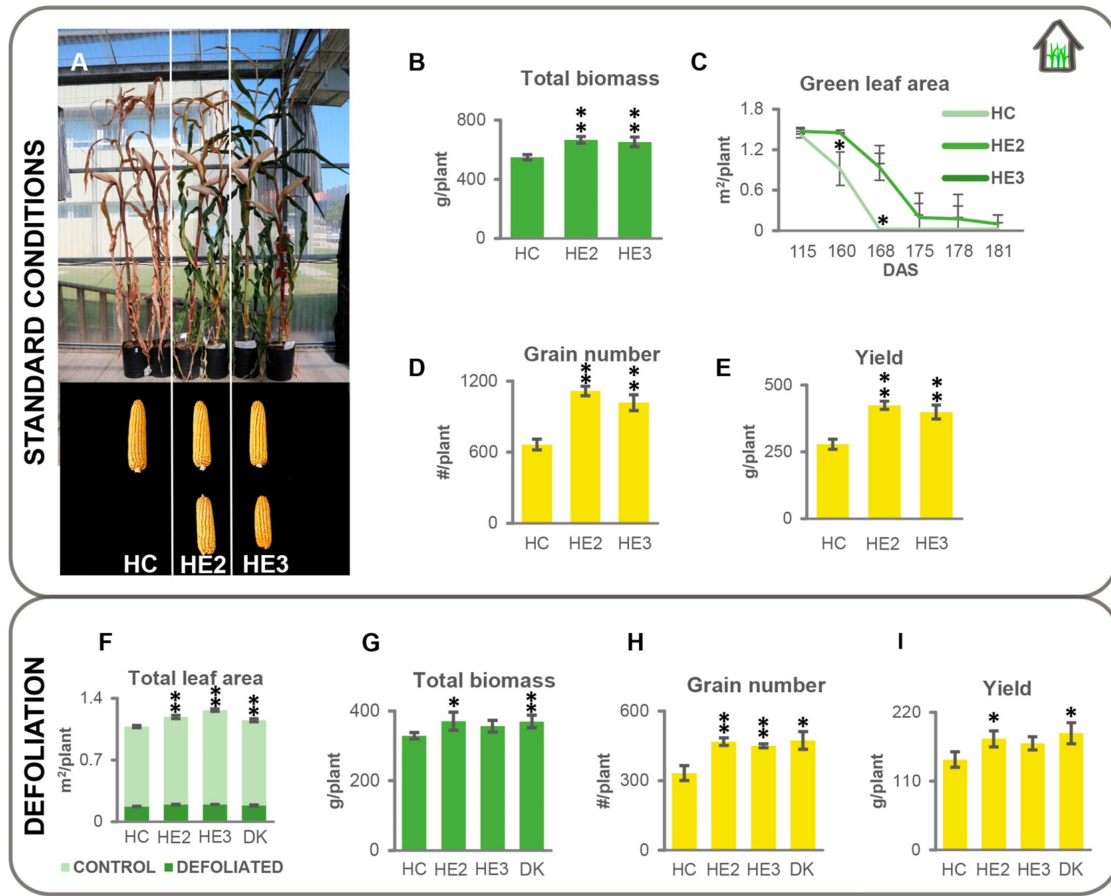

**Figure 3 . *HaHB11* transgenic hybrids tested in the greenhouse, exhibited delayed leaf senescence and greater yield than controls in standard growth conditions and after defoliation**

Upper panel: Illustrative photograph of B73 x Mo17 hybrids plants and their cobs (A). Total biomass (B). Senescence during grain filling (C). Grain number (D) and yield (E) at the end of life cycle. Plants were grown in normal conditions. Lower panel: Total leaf area of plants before (F, light green), and after defoliation (F, dark green). Total biomass, grain number and yield of defoliated plants at harvest (G, H, I). Data represent means  $\pm$  SEM of at least 4 biological replicates. Asterisks indicate significant differences respect to the control genotype (\* for  $P < 0.05$  and \*\* for  $P < 0.01$ ).

192 *HaHB11* transgenic hybrids exhibited enhanced tolerance to waterlogging and defoliation in  
193 greenhouse and field assays

194 Aiming at knowing *HaHB11* hybrids performance under abiotic stress conditions, we carried  
195 out defoliation and waterlogging assays firstly in the greenhouse. Defoliation was  
196 performed manually 11 days after silking on transgenic and control hybrids. The leaf area  
197 removed from *HaHB11* plants was slightly larger than from controls because individual leaf  
198 area was larger among plants of the former (Figure 3F). Despite defoliation, at the end of  
199 the cycle, transgenics had increased biomass, seed yield, and grain number than control  
200 plants (Figure 3G, 3H, 3I). These results were similar to those obtained with the parental line  
201 B73, both in the field and the greenhouse. Notably, the F1 hybrid DK72-10<sup>®</sup> included as a  
202 reference, for comparison with a commercial product currently used by farmers, showed  
203 similar results as *HaHB11* ones.

204 Regarding waterlogging, root development was assessed by measuring different traits  
205 related to flooding tolerance. Similar to *HaHB11* lines, transgenic hybrids exhibited  
206 increased root volume and biomass, as well as a higher number of xylem vessels/pith area  
207 than controls (Figures 4A, 4B, 4C, 4E). To understand whether these differential traits lead  
208 to differences in radial oxygen loss, we treated the roots with methylene-blue. Figure 4D  
209 confirmed that control roots lost more oxygen (blue-stained roots) than *HaHB11* roots,  
210 indicating that this mechanism could be contributing to the hypoxia tolerance showed by  
211 the transgenic plants. This result may explain the enhanced chlorophyll content (Figure 4F)  
212 and the number of vascular bundles (Figures 4G, 4H) of transgenic plants with respect to  
213 controls detected on 14 days after waterlogging when plants were already growing in  
214 standard conditions. At flowering, leaves were larger in the transgenics than in the control  
215 plants (Figure 4I), and both independent events exhibited delayed senescence (Figure 4L).  
216 Moreover, the transgenics showed a higher number of nodal roots, compared with controls  
217 on the hybrid background (Figure 4J, 4K). All these characteristics explained, at least in part,  
218 the increased total biomass and grain yield of *HaHB11* plants (Figure 4M, 4N).

Figure 4

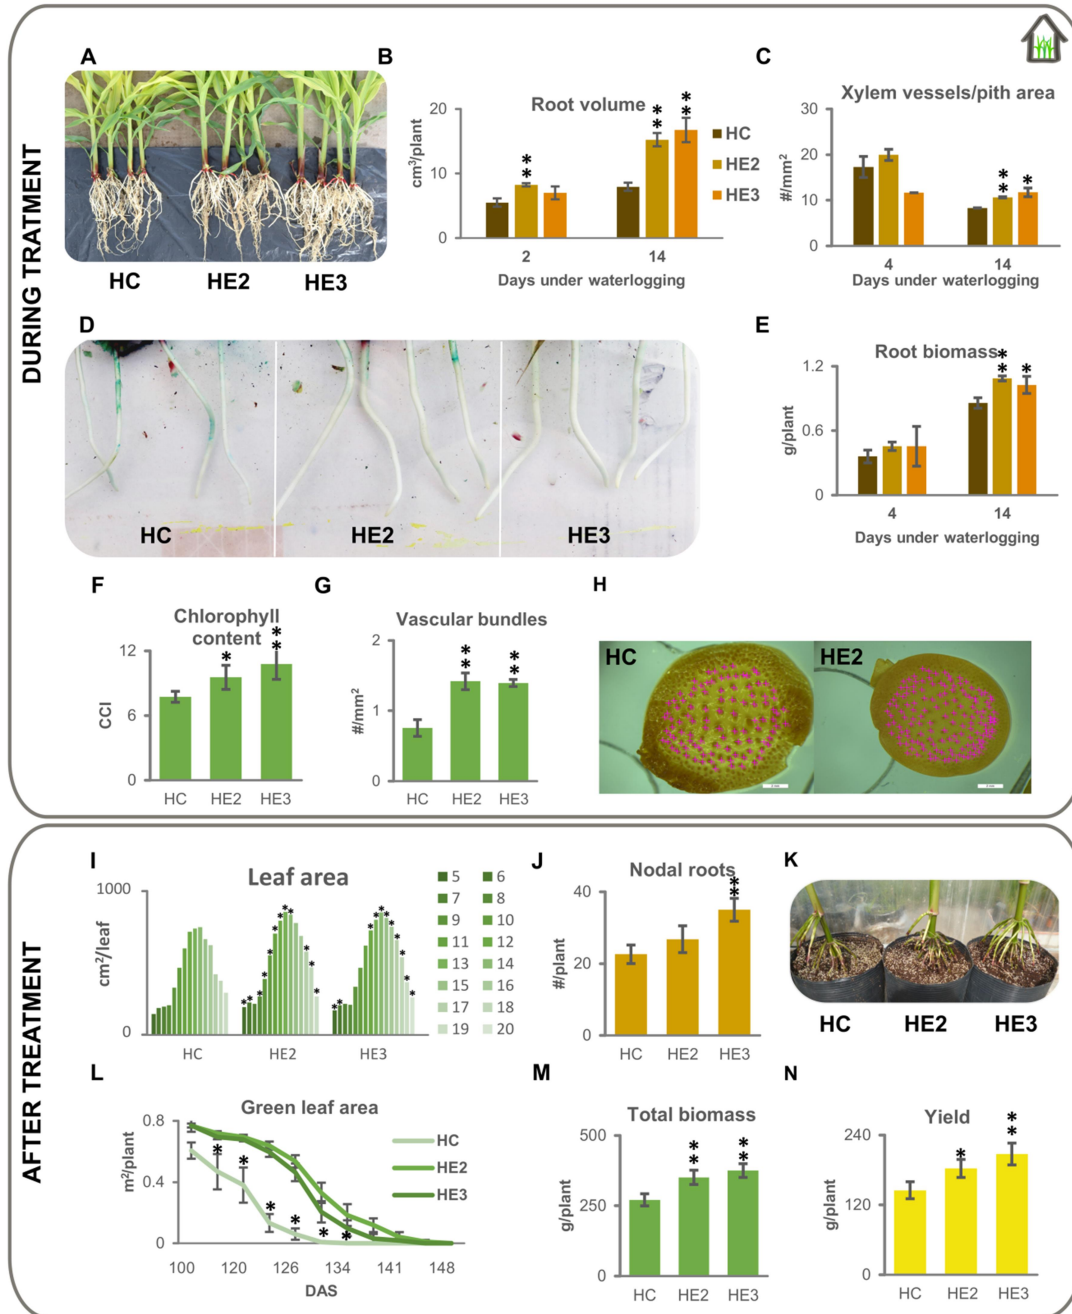

**Figure 4. Transgenic hybrids expressing *HaHB11* showed improved performance during waterlogging stress and after recovery than controls in the greenhouse.**

Illustrative image of hybrid controls (HC) and transgenic events (HE2 and HE3) after two weeks of waterlogging treatment (A). Root volume (B), xylem vessels per pith area (C), and root biomass (E). Illustrative photograph of roots stained during one hour with methylene blue, taken 2 weeks after initiating waterlogging treatment (D). Chlorophyll content of the 5<sup>th</sup> leaf after 14 days of waterlogging treatment (F). Illustrative picture of vascular bundles in transversal sections of stems. Vascular bundles are marked with a pink cross (G, H). Phenotype of maize plants subjected to 14 days of waterlogging, and then grown in normal conditions until harvest.

Individual leaf area from leaf 5 to 20 (I). Total nodal roots and representative photograph of the plants (J, K). Green leaf area of plants at the end of grain filling (L). Total biomass and yield at harvest (M, N). Data represent means  $\pm$  SEM of at least 4 biological replicates. Asterisks indicate significant differences respect to the control genotype (\* for  $P < 0.05$  and \*\* for  $P < 0.01$ ).

219 In the field, the results were similar to those observed in the greenhouse when roots were  
220 evaluated after 12 days of waterlogging treatment. In transversal cuts of adventitious roots,  
221 transgenic plants developed a higher number of xylem vessels/pith area (Figure 5A, 5D).  
222 Tissue damage was detected on the pith of control roots, whereas the medulla was intact in  
223 the transgenic ones (Figure 5A). Such damage could be generating an impaired function in  
224 control roots. Moreover, transgenic roots accumulated more lignin than the control ones  
225 (Figure 5B), suggesting that controls lost more radial oxygen than transgenics. Stating that  
226 transgenic plants deal better with the oxidative stress triggered by waterlogging, NBT  
227 staining was carried out seven days after the treatment, resulting in reduced superoxide  
228 accumulation in *HaHB11* plants (Figure 5C).

229 Once the plants were growing in standard field conditions, the phenotype was assessed  
230 until the end of the life cycle. Individual leaf area was larger in *HaHB11* recovered plants  
231 compared to controls, and as in other mentioned assays, they had delayed senescence and  
232 developed more biomass (Figures 5E, 5F, 5G). Grain number and yield were higher for  
233 *HaHB11* plants in control conditions as well as after defoliation and waterlogging (Figure 5I,  
234 5J). The results suggest that yield increase is mainly due to the enhanced grain number  
235 (Figure 5H). As expected, the DK72-10 hybrids yielded more than the rest of the evaluated  
236 genotypes in standard growth conditions (Figure 5J). However, penalization after defoliation  
237 was the highest for this hybrid, and its seed yield was similar to that of transgenic *HaHB11*  
238 plants (Figure 5J).

Figure 5

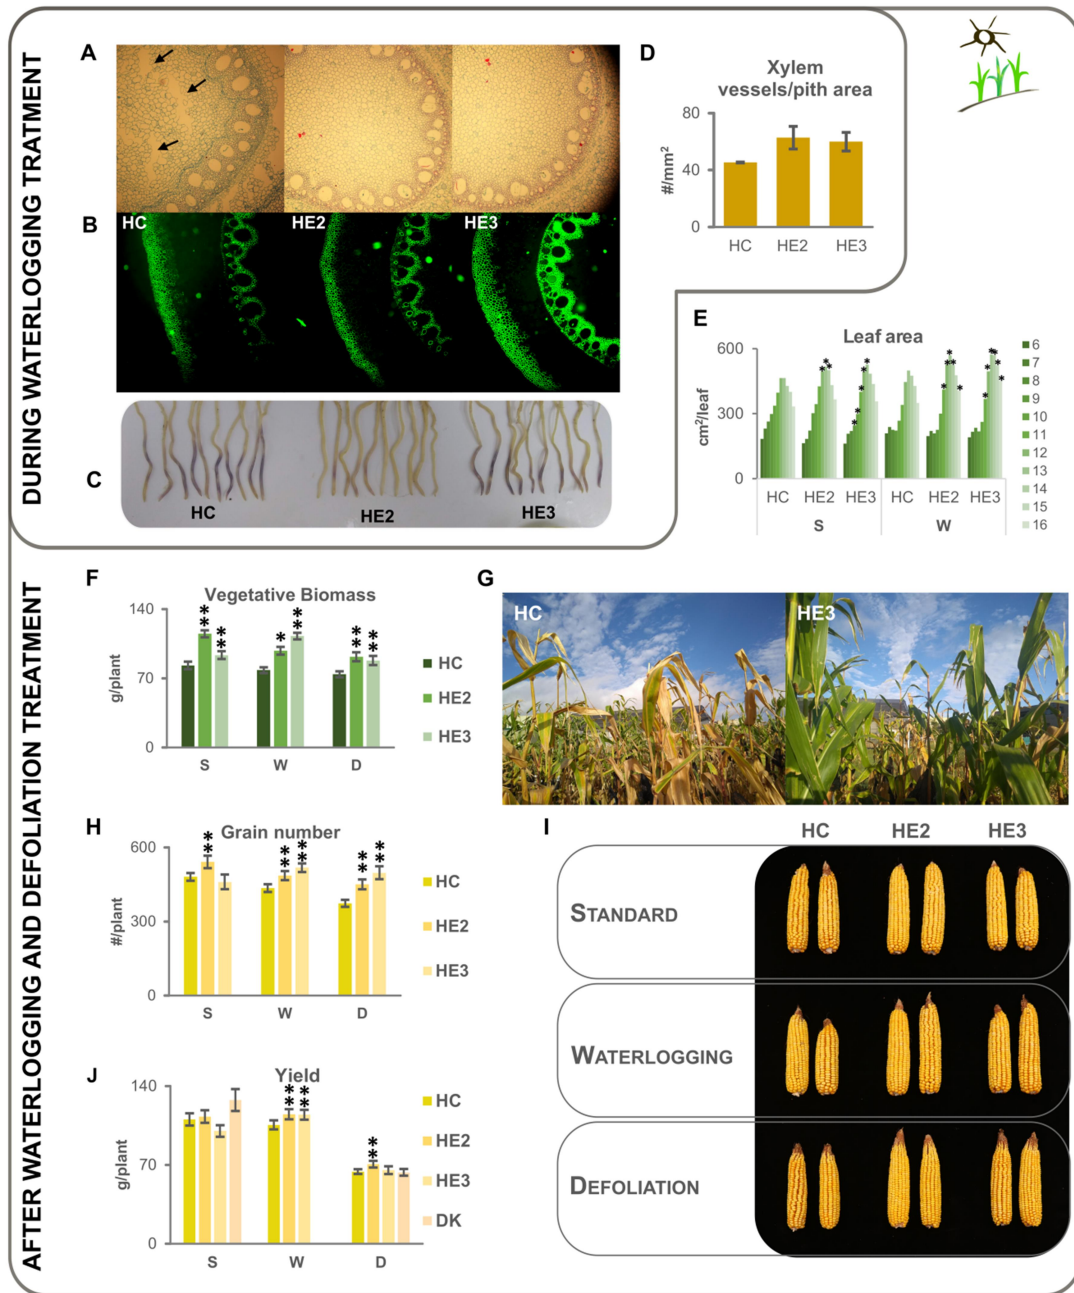

239 *HaHB11* modulates the expression of genes involved in carbohydrate metabolism,  
 240 detoxification, and waterlogging response

241 To unravel the molecular basis of waterlogging tolerance exhibited by *HaHB11* plants, we  
 242 selected genes described as differentially regulated in tolerant accessions or after  
 243 waterlogging treatments.



244 Transcriptional regulation is a dynamic and fine-tuned process that changes depending on  
245 various factors such as stress conditions. We were particularly interested in gene expression  
246 kinetics in *HaHB11* plants modulated by waterlogging. Samples were harvested from roots  
247 of plants grown in the greenhouse one day after treatment initiation, and from roots and  
248 leaves of field-grown plants on 4, 6, and 12 days after treatment initiation.

249 In roots, expression levels of *GAPDH*, *ADH*, *G6PI*, *BE7*, *PG*, *SUT1*, *AP2*, *GLK1*, *HMT*, *HQX*, *MS1*,  
250 *PGK*, and *INV2*, mainly involved in carbohydrate metabolism and transport, were assessed.

251 In the greenhouse, *G6PI*, *GAPDH*, *INV2*, and *AP2* were differentially induced in *HaHB11*  
252 plants, whereas *ADH*, *PGK*, *MS1*, and *HMT* showed the opposite regulation (Figures 6 and  
253 S3). The scenario changed in the field. In these conditions, the more remarkable results  
254 were the earlier induction of *BE7* in the transgenics (4 days) compared to controls (6 days),  
255 and the faster repression of *GADPH* on 4 days after treatment (Figure 6). Among the  
256 selected genes, several did not show differential regulation between genotypes, and others  
257 were not detectable in roots or leaves harvested at these developmental stages  
258 (Supplementary Figure S3).

259 In leaves, the evaluated genes were *GAPDH*, *ADH*, *GPI*, *SWEET13*, and *ACS3*. Such genes are  
260 involved in carbohydrate metabolism and transport. Among them, those showing significant  
261 differences between genotypes were *GAPDH*, *ADH*, and *G6PI*. *GAPDH* was only induced in  
262 *HaHB11* plants after 12 days of treatment (Figure 6A), whereas *G6PI* showed higher  
263 expression levels in the transgenic leaves than in the control ones, both after 4 or 12 days of  
264 treatment (Figure 6A). Other evaluated genes did not show differential regulation between  
265 genotypes or treatments (Supplementary Figure S3).

266 To assess whether the observed transcriptional changes affected carbohydrate contents,  
267 sucrose and starch concentrations were evaluated in roots and leaves of waterlogged  
268 plants. In leaves, the hybrids HE2 and HE3 had more sucrose than controls. After 4 and 7  
269 days of waterlogging, starch content was similar in all the genotypes; however, 12 days after  
270 initiating the treatment, controls accumulated more starch in the leaves than transgenic  
271 hybrids, suggesting that *HaHB11* plants were more efficient to deliver carbohydrates to  
272 other active growing sinks. In agreement, roots of *HaHB11* hybrids exhibited more starch  
273 than controls after 4, 7, and 12 days of treatment (Figure 6B).

**FIGURE 6**

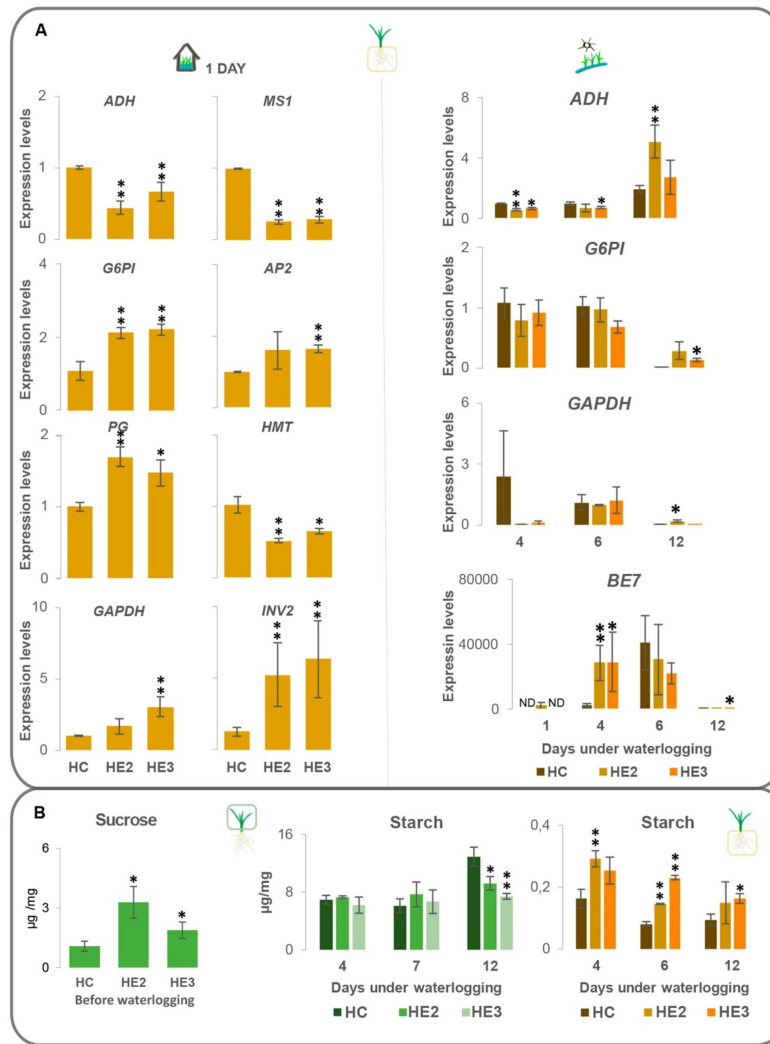

**Figure 6. Transgenic HaHB11 hybrids showed differential expression of genes related with waterlogging tolerance and carbohydrate contents**

A. Transcript levels of *ADH*, *G6PI*, *GAPDH*, *INV2*, *PGK*, *MS1*, *AP2*, and *HMT* genes involved in waterlogging response in *HaHB11* transgenic roots of the control (HC) and transgenic hybrids (HE2 and HE3), evaluated one day after initiating waterlogging treatment (left panel), or after 4, 6, and 12 days of treatment (right panel). B. Sucrose and starch contents before or after waterlogging treatment in leaves and roots of the control (HC) and transgenic hybrids (HE2 and HE3). All the values were normalized with endogenous *ACTIN* and then with the one obtained in the control, arbitrary assigned a value of one. The ID codes for the tested genes are listed in Supplementary Table S2. Each point is the average of four plants and error bars represent standard error of the mean (SEM) x 2. Asterisks indicate significant differences respect to the control genotype (\* for P<0.05 and \*\* for P<0.01).

274 *In situ* canopy spectral reflectance helped discriminate maize genotypes nondestructively  
275 across growing conditions

276 Traditional ground-based crop phenotyping of secondary, physiological traits aimed at  
277 breeding is usually limited by the number of plants that can be evaluated and is being  
278 replaced by nondestructive methods such as spectral images (Reynolds *et al.*, 2021), which  
279 produce a large number of data and consequently the need of adequate computing tools for  
280 their analysis. Evaluation of canopy spectral reflectance in crops is done predominantly by  
281 studying a collection of vegetation indices (VIs), comparing their performance to select a  
282 single one or a few of them that better represent a trait of interest (Reynolds *et al.*, 2021). It  
283 is less customary to explore the potential of several VIs jointly for capturing differences  
284 among genotypes within a single environment (Arias *et al.*, 2021), as we did in current  
285 research using a set of 29 selected VIs to discriminate maize genotypes grown under  
286 different conditions.

287 Statistical significances for VI values were analyzed for the factor genotype with a one-way  
288 analysis of variance (ANOVA) and a posthoc Tukey test. We chose a p-value of 0.05 for  
289 statistical significance. Each ANOVA was performed on a set of 162 VI values, comprising 18  
290 measurements per plot on the nine plots per treatment (three repetitions for each of the  
291 three genotypes). One ANOVA per date and treatment was performed, giving a total of 261  
292 (three dates, three treatments, and 29 VIs) ANOVAs for VI and their corresponding posthoc  
293 tests. When the spectral behavior of the evaluated genotypes was analyzed, we detected  
294 that the set of VIs that allowed their discrimination varied across treatments. For plants  
295 grown in control conditions, 21 VIs successfully discriminated genotypes carrying *HaHB11*  
296 from controls during the grain-filling stage, whereas, for the defoliation assay, only 14 VIs  
297 did the same (Supplementary Figure S5). For the waterlogging condition, the measurement  
298 carried out on the first date revealed differences in VI values, being E3 always significantly  
299 different from its control while E2 was only clearly discriminated from it in the control  
300 condition (Supplementary Figure S5). The VIs considering biomass, chlorophyll, and abiotic  
301 stress clearly differentiated transgenics from controls (Figure 7). Furthermore, PCA analyses  
302 for all treatments and all genotypes, showed the weights of the selected VIs, with vectors  
303 along PC1 and PC2 components far from 0, meaning that all of them are relevant to  
304 discriminate between genotypes. Besides, when a PCA was done per treatment, the VIs

305 showed significant loadings, but they did not maintain the same clustering pattern  
306 (Supplementary Figure S5).

## FIGURE 7

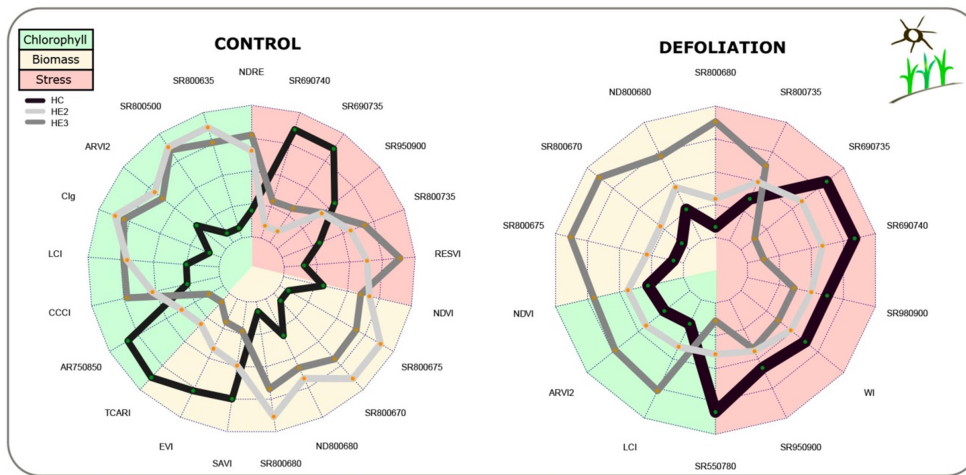

**Figure 7. Vegetation indices computing spectral data are able to discriminate genotypes and treatments.**

Radar plots showing significantly different values of VIs between genotypes for standard and defoliation treatments. Black line: control genotype. Light grey and grey lines: E2 and E3 genotypes, respectively. Background colors indicate the applicability of the VIs. Green: chlorophyll, pink: water stress, light pink: biomass.

307 The enhanced biomass, seed number, and grain yield exhibited by HaHB11 plants were  
308 robust and consistent traits across all the genetic backgrounds and tested conditions

309 Given the variety of growing conditions, environments, and genetic backgrounds in which  
310 the performance of the transgene *HaHB11* was tested, we performed a statistical analysis to  
311 determine the robustness of the differences in the evaluated traits as well as the  
312 relationship among them. Variance and multivariate analysis, including a principal  
313 component analysis (PCA), were carried out using all the data, considering inbreds, hybrids,  
314 greenhouse, and field assays in control and stress conditions (Supplementary Table S2 and  
315 Figure 8A).

316 Considering waterlogging effects, the PCA explained 89.5% of the variation produced by this  
317 condition early in development (Figure 8A). Within each water regime, hybrids had larger  
318 grain yield than inbreds and in the control condition, larger grain yield than under  
319 waterlogging stress. In general, both transgenic events, but particularly E3, had a larger  
320 grain yield than the control. Grain yield was associated with harvest index (acute angles  
321 between vectors) and did not respond to the variation in stem section, days to flowering,  
322 and ASI; vectors in right angle). Inbreds were located towards positive values of the PC2,  
323 with a higher number of roots and leaves and a longer vegetative period. Hybrids had  
324 enhanced harvest index (independently of the soil water condition) and longer ASI  
325 (particularly under waterlogging).

326 Aiming at knowing which traits are more related to the performance of HaHB11 plants in  
327 different conditions, an additional PCA was carried out considering only hybrids grown in  
328 the field subjected to stress caused by waterlogging or defoliation. The PCA explained 76.9%  
329 of the total variability. Hybrids carrying *HaHB11* always had a larger grain yield than the  
330 control under stressful conditions. Collectively, grain yield was tightly related to leaf area,  
331 total biomass, grain yield components, and harvest index; it had no relationship with leaf  
332 number and was negatively related to the extension of the vegetative period and the ASI.  
333 Within each growing condition, transformed genotypes tended to have larger grain numbers  
334 than the control, whereas the opposite trend was verified for individual grain weight (Figure  
335 8B).

**Figure 8**

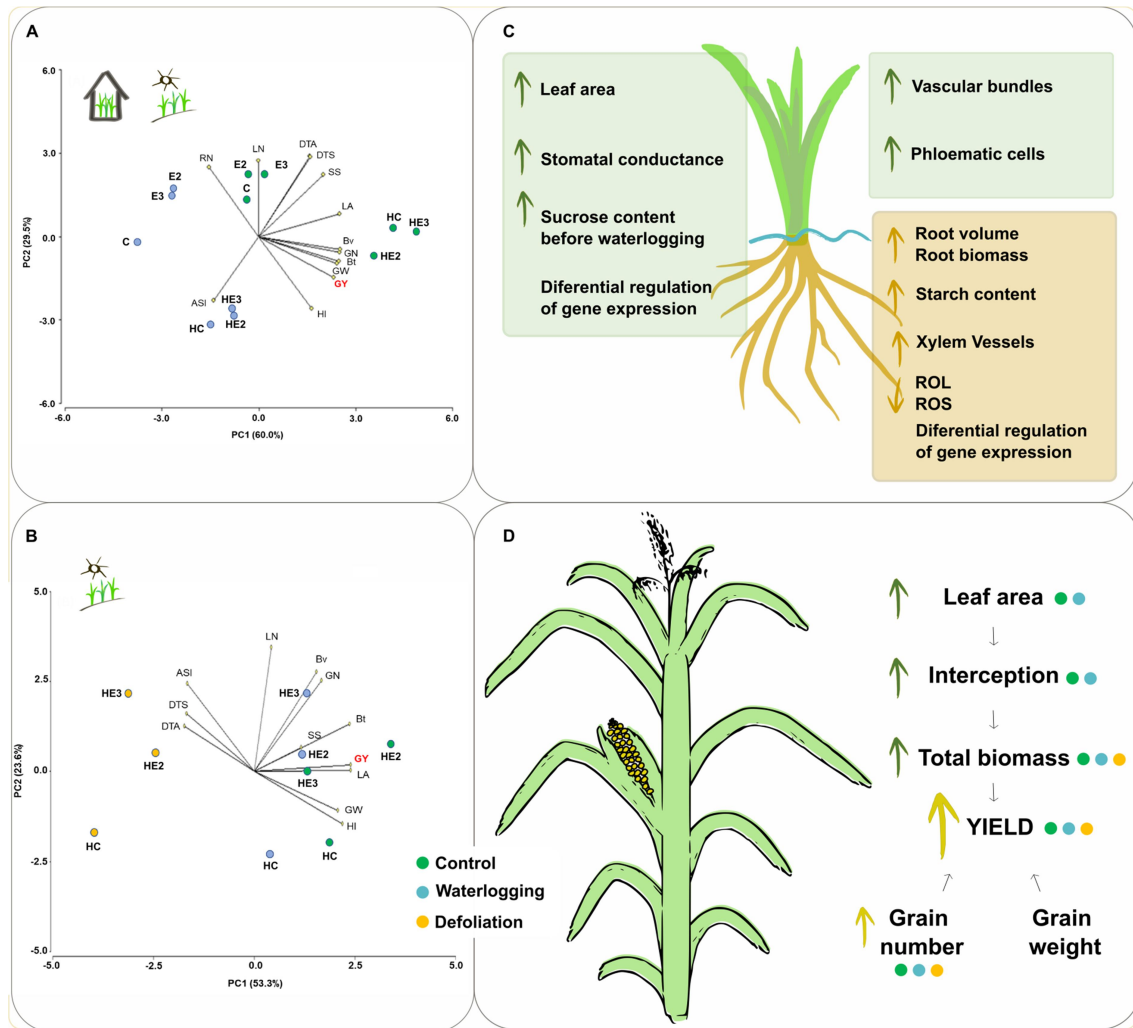

**Figure 8. The beneficial effects conferred by *HaHB1* to maize plants are statistically robust**  
**A and B.** Principal component analyses (PCA) performed using all the data presented in this manuscript. **C.** Summary of the differential traits assessed between transgenic and control maize plants at the vegetative stage (V3) subjected to waterlogging. **D.** Summary of the differential traits assessed between transgenic and control maize plants at harvest after different treatments. Circles indicate (i) plants grown in control (blue) or waterlogging (green) conditions, and (ii) plants exposed to defoliation (orange).

336 **Discussion**

337 The expected second generation of transgenic plants is still absent in the market. The  
338 reasons for this are diverse, including the negative public perception of genetically modified  
339 crops and the fact that abiotic stress-tolerant crops do not represent a universal business  
340 since they are limited to target environments (Chan *et al.*, 2020). However, the need for  
341 stress-tolerant crops remains actual and current due to global climate change and the  
342 increase of natural disasters. Although drought is still the major constraint for crop yield  
343 worldwide, flooding and severe storm episodes augmented their frequency with direct  
344 consequences for food and fuel production. Particularly, between 2006 and 2016, 65% of  
345 economic damage registered in crops was caused by abiotic stresses linked to excess water  
346 (FAO, 2017). To diminish the impact of such problems, breeders and biotechnologists work  
347 hard to obtain crops with improved behavior when exposed to abiotic and biotic stress  
348 factors. Usually, these efforts are not cooperative, and there is abundant scientific literature  
349 describing the research of stress-tolerant plants not tested in the field but only under  
350 controlled conditions or presenting very slight improvements (Sadras *et al.*, 2020). Another  
351 important aspect of this research area is the slow but constant replacement of manual  
352 measurements by high-throughput phenotyping with modern, automated equipment that  
353 produces large databases and demands big data analysis. In this work, we presented the  
354 results of interdisciplinary research work, starting from molecular biology in the laboratory  
355 to spectral phenotyping in the field, performed to test the sunflower gene *HaHB11* as a  
356 potential tool to improve stress tolerance in maize.

357 The sunflower transcription factor *HaHB11* has already been described as a transgene in the  
358 model *Arabidopsis* (Cabello *et al.*, 2016) and maize plants (Raineri *et al.*, 2019). In maize,  
359 transgenic plants were obtained in the ancient hybrid Hill (AxB) background and then  
360 backcrossed several times with the B73 line. When evaluated in greenhouse and field  
361 conditions under irrigation, these plants showed improved yield, mainly supported by a  
362 higher grain number than controls.

363 Maize is a species affected by flooding, mostly early in development (usually up to V2) and  
364 to a lesser extent in subsequent stages (Zaidi *et al.*, 2004). Several works were dedicated to  
365 analyzing the effects of waterlogging, also called excess soil moisture (ESM) on contrasting  
366 genetic backgrounds (hybrids and inbreds). Such studies, applying varied waterlogging  
367 treatments, focused on physiological traits or/and molecular mechanisms. The more robust

368 results indicated that the genotypes exhibiting early adventitious rooting, aerenchyma  
369 formation, a barrier to radial oxygen loss in roots, partial stomatal closure in leaves, and  
370 increase of NAD-ADH activity and starch accumulation in stem tissues were more tolerant to  
371 ESM than those that did not exhibit these traits (Zaidi *et al.*, 2003). Notably, these attributes  
372 were common in induced hypoxia tolerance and allowed identifying associated QTLs (Abiko  
373 *et al.*, 2012; Zaidi *et al.*, 2003). Increased ADH activity was a characteristic observed in  
374 adapted subtropical and tropical inbreds. Although the content of ethanol (the product of  
375 this enzyme) was higher in the susceptible genotypes, the ability to extrude it seemed to be  
376 increased in the tolerant ones (Zaidi *et al.*, 2007). Tolerant and susceptible genotypes in  
377 advanced developmental stages differed in their ability to accumulate carbohydrates in  
378 stem tissues, the extension of the ASI, root porosity, and stomatal conductance (Zaidi *et al.*,  
379 2004). In agreement with these previous reports using different genetic backgrounds,  
380 *HaHB11* plants showed increased leaf area together with higher stomatal conductance, root  
381 length, and biomass than control plants after waterlogging treatments (Figures 1-4).  
382 Moreover, histological cuts of waterlogged roots evidenced tissue damage in the pith of  
383 control plants and an increased number of xylem vessels in the transgenics that could be  
384 associated with this stress response (Figures 1-5). Moreover, transgenic roots seemed to  
385 have a “tight” barrier to oxygen loss, compared to those of the wild type (Figure 5). After  
386 recovery, the transgenics exhibited an increase in nodal roots, stem surface, biomass, light  
387 interception, and chlorophyll, which resulted in an improved grain yield (Figures 1-5).  
388 Regarding the mechanisms playing a role in waterlogging adaptation, inbreds showing  
389 susceptibility had a reduced dry matter translocation from source to sink tissues, which  
390 resulted in an inadequate grain filling (Kaur *et al.*, 2021). Transgenic *HaHB11* plants,  
391 described here, accumulated more biomass and partitioned a larger part of it to grains,  
392 setting a higher grain number, resulting in increased yield compared to controls (Figure 5).  
393 An interesting question is if the waterlogging tolerance observed in several inbred  
394 genotypes was maintained in hybrids. It was reported that morpho-physiological traits  
395 differed between normal conditions and waterlogging and that hybrids were superior to  
396 parental lines under stress. Most of the characteristics associated with ESM tolerance in  
397 hybrids correlated positively with those of parental lines, but in normal moisture conditions,  
398 the effect of heterosis was more important than the contribution of the parental line (Zaidi  
399 *et al.*, 2007).



400 In a more recent trial, different hybrids were tested in the V2 stage for their tolerance to  
401 waterlogging, evaluating similar parameters as in inbreds, after 7, 14, and 21 days of ESM.  
402 Although all the assessed hybrids showed a decrease in the evaluated traits, differences  
403 were detected between the tolerant and the susceptible ones (Kaur *et al.*, 2021).

404 Regarding the molecular level, tolerant genotypes exhibited adaptive mechanisms enabling  
405 hypoxia tolerance. These plants had upregulated genes encoding enzymes participating in  
406 carbon metabolism and signal transduction, such as alcohol dehydrogenase, sucrose  
407 synthase, aspartate aminotransferase, NADP-dependent malic enzyme (Kaur *et al.*, 2021).  
408 Notably, some of these genes were also differentially regulated in *HaHB11* plants, albeit not  
409 always in the same sense (up or down, Figure 6). This contrasting result can be explained by  
410 the high turnover of genes observed after different waterlogging treatments and conditions.  
411 In transcriptome analyses performed with waterlogged maize plants, a huge variation in  
412 gene regulation was reported (Arora *et al.*, 2017; Du *et al.*, 2017; Rajhi *et al.*, 2011). The only  
413 gene robustly regulated across all assays encoded a polygalacturonase (GRMZM2G037431,  
414 Li *et al.*, 2019, Rajhi *et al.*, 2011, Arora *et al.*, 2017), and it was also upregulated in *HaHB11*  
415 transgenic plants.

416 Crop defoliation may recognize different origins, biotic like insect attack or abiotic as heavy  
417 rain, wind, or hail storms. In the trials described here, a summer storm produced severe  
418 defoliation (Figure 5). Although the serendipitous nature of the event, it allowed us to learn  
419 that *HaHB11* plants performed better than controls in response to such harmful conditions.  
420 The crop yield depends on the quality (i.e. size and activity) of the photosynthates source  
421 and the ability to transport assimilates to sink tissues. In maize, a consistent trend in seed  
422 dry weight was observed when assimilates during active grain filling were dramatically  
423 diminished by defoliation (Borrás *et al.*, 2004). We hypothesized that because the storm  
424 occurred when the number of grains was almost already established, and transgenic plants  
425 set more grains than controls, the source-sink relationship may have been more affected  
426 among the former than among the latter. To corroborate this hypothesis, we developed  
427 controlled defoliation assays (Figure 5). As expected, the commercial hybrid, used as  
428 control, yielded more than all other hybrids in potential growing conditions; however, after  
429 a defoliation treatment, it was more penalized than the transgenic hybrids, indicating that a  
430 tolerant parental line in *HaHB11* plants contributed to a better performance in such  
431 condition. It is important to note that the influence of defoliation on crop yield depends on

432 its timing and severity. During vegetative stages, it may have no or little effect, whereas  
433 even a mild hail can produce a reduction on grain yield of 30% or more when it occurs from  
434 the start of the critical period onwards (Battaglia *et al.*, 2018), depending upon the relative  
435 impact on light interception efficiency (Borrás *et al.*, 2004; Cerrudo *et al.*, 2013).

436 Described differences among genotypes across treatments and environments were  
437 confirmed by multivariate analysis and assessed through vegetation indices (VIs) indicative  
438 of variations in canopy spectral reflectance. Rather than selecting the best VI for describing  
439 each evaluated trait (García-Martínez *et al.*, 2020), we opted for a joint analysis of 29 VIs to  
440 capture differences among genotypes in a single environment (Arias *et al.*, 2021). Although  
441 genotypes could be differentiated, it was not the same set of VIs that allowed their  
442 discrimination across treatments. On the one hand, this response is indicative of the  
443 capacity of VIs to track the fast changes in plant metabolism in response to the environment  
444 (Reynolds *et al.*, 2021). On the other hand, described shifts in the way VIs ranked genotypes  
445 along the cycle alert on the need for further research aimed to understand the interrelation  
446 between spectral data and differential gene expression among genotypes.

447

#### 448 **Conclusions**

449 In current research, we demonstrated the advantage of maize genotypes transformed with  
450 *HaHB11* to withstand transient episodes of ESM that take place early in the cycle. This  
451 response is probably linked to their improved root system because the negative effects of  
452 ESM in mentioned stages usually affect roots more than shoots (de San Celedonio *et al.*,  
453 2017), and we observed that starch content accumulated in leaves and decreased in roots of  
454 the control genotypes whereas the opposite trend occurred in genotypes transformed with  
455 *HaHB11*. The latter is indicative of an active metabolism despite the stressful anaerobic  
456 condition. Being the recovery of roots lower than that of shoots, plants bearing *HaHB11*  
457 may be in better conditions than the controls to withstand subsequent stressful scenarios  
458 along the cycle (e.g. defoliation, enhanced evaporative demand), which are not uncommon  
459 among field-grown plants.

## 460 **Materials and Methods**

### 461 Plant material and growth conditions

462 Greenhouse assays: maize plants of different genotypes (B73 lines and B73 x Mo17 hybrids)  
463 were grown during 2017 and 2021 at the Institute of Agrobiotechnology, located at Santa Fe  
464 (31°38'17.1"S, 60°40'01.8"W). Plants were cultivated in 45 L pots under long-day  
465 photoperiod (16/8 h light/dark cycles), with daily temperatures fluctuating between a mean  
466 minimum of 10°C and a mean maximum of 40°C.

467 Field trials: experiments were performed during 2017 and 2020 at the IAL, on a sandy soil of  
468 2 m depth with low water-holding capacity and an organic 'A' horizon of 15 cm. Evaluated  
469 germplasm included the following genotypes: controls (null segregants) and transgenic lines  
470 (E2 and E3) of B73 lines (transformed Hill backcrossed 3-4 times to B73, experiments 1 and  
471 2) as well as B73 × Mo17 hybrids (experiment 3) and commercial F1 hybrid DK 72-10®(all  
472 experiments). The sowing date took place at the beginning of November using a single stand  
473 density of 9 plants m<sup>-2</sup>. Genotypes were distributed in a completely randomized design with  
474 three replicates. Each plot had three rows of 1.25 m and 0.5 m between rows. Plots were  
475 drip-irrigated along the whole cycle to keep the uppermost 1 m layer at field capacity and  
476 were fertilized with N (180 kg ha<sup>-1</sup> at sowing and 180 kg ha<sup>-1</sup> at tasseling) and P (100 kg ha<sup>-1</sup>  
477 at sowing). Plots were kept free of weeds, insects, and diseases. Daily mean temperature (in  
478 °C) and incident solar radiation (in MJ m<sup>-2</sup> day<sup>-1</sup>) were obtained from a nearby  
479 meteorological station. All experiments were carried out after obtaining the corresponding  
480 authorization from the CONABIA (National Committee of Biotechnology) and INASE (Seeds  
481 National Institute).

482

### 483 Waterlogging treatments

484 In greenhouse experiments, plants (all the tested genotypes) with three expanded leaves  
485 (V3) were placed in a plastic pool. At the beginning of the day, enough water was added to  
486 cover half of the pot height. At midday, the water level raised until 1 cm above the ground  
487 for two weeks.

488 In field assays, the pots were placed in pools. At the V3 stage, plants were waterlogged  
489 during 14 days, keeping the water level 1 cm above the ground. After the treatment plants  
490 from all genotypes were placed at the same time in the experimental field and grown under  
491 irrigation until the end of the life cycle.

492

493 Defoliation assays

494 In the field trial, the first defoliation episode occurred 11 days after silking. The second and  
495 third experiments were carried out in the field and greenhouse, respectively, by manually  
496 defoliating plants, eleven days after silking leaving only the ear leaf and the leaf immediately  
497 above it. All ribs were kept, emulating the field defoliation.

498

499 Plant and crop phenotyping

500 Measurements were performed on five plants per genotype (greenhouse) or six plants from  
501 the central row of each plot (field) which were tagged at V3, as previously described (Raineri  
502 *et al.*, 2019). Dates of ASI were registered for all plants. At silking, the total number of fully  
503 expanded leaves and total plant leaf area were measured. Individual leaf area was  
504 computed as in Equation 1 (Montgomery, 1911)

505

506 Leaf area= Maximum leaf length × maximum leaf width × 0.75 (1)

507

508 All tagged plants were oven-dried for estimation of total aerial plant biomass. Grain yield  
509 was expressed on a 14.5 % wet basis. Harvest index (HI) was estimated as the quotient  
510 between grain yield and plant biomass (on a dry basis).

511

512 Stomatal conductance

513 Stomatal conductance was measured with a porometer (Decagon® SC-1). All measures were  
514 taken at midday.

515

516 Carbohydrate and chlorophyll contents

517 Starch, sucrose, glucose, and protein contents from roots and leaves of at least 4 plants  
518 were assessed as previously described (Cabello *et al.*, 2016). Chlorophyll content was  
519 determined either by acetone extraction (Raineri *et al.*, 2019) or by using a specific  
520 chlorophyll meter device (Cavadevices®,  
521 <https://cavadevices.com/archivos/FOLLETOS/Clorofilio.pdf>).

522

523 Allometric measurements during waterlogging stress in roots

524 At least four plants were harvested and the roots were washed. Total adventitious roots,  
525 root length and root were quantified. Root volume was assessed by a volumetric method:  
526 80 ml of deionized water ( $V_W$ ) was placed in a tube; then, the root system was completely  
527 submerged and the volume of water plus the root ( $V_{W+R}$ ) was measured. The root volume  
528 ( $V_R$ ) was calculated as follows:  $V_R = V_{W+R} - V_W$

529

#### 530 Radial oxygen loss

531 The radial oxygen loss in roots was measured as described (Watanabe *et al.*, 2017). Four  
532 plants per genotype were selected after the waterlogging treatment. All the adventitious  
533 roots were removed, except one of 10-14 cm length. Plants having a single nodal root were  
534 placed in a pot with methylene-blue solution and photographed after 1 hour of incubation.

535

#### 536 NBT staining

537 Roots were collected and placed in a solution containing NBT 0,1 mg/ml in 25 mM Hepes pH  
538 7,6 and 0,05% Triton X-100. The samples were vacuum-infiltrated for 15 minutes and  
539 incubated for an additional hour at 37°C.

540

#### 541 RNA isolation and expression analyses by real-time RT-PCR

542 Total RNA for real-time RT-PCR was isolated from maize leaves or stems using Trizol®  
543 reagent (Invitrogen, Carlsbad, CA, USA) and real-time qPCR was performed using an  
544 Mx3000P Multiplex qPCR system (Stratagene, La Jolla, CA, USA) as described before (Raineri  
545 *et al.*, 2019). Primers used are listed in Supplementary Table S1.

546

#### 547 Histology

548 Histology of the cross-sections was carried out as previously described (Cabello *et al.*, 2016)  
549 and stained with safranine fast-green. The xylem and pith area were assessed using the free  
550 software ImageJ (Schneider *et al.*, 2012). For lignin content, the cross-sections were  
551 evaluated using an epifluorescence microscope.

552

#### 553 Remote sensing analyses

554 Canopy spectral reflectance was measured using a compact shortwave NIR spectrometer  
555 (Ocean Insight). The instrument is sensitive to 1024 wavelengths in the range from 632 nm

556 to 1125 nm with an optical resolution of 3 nm at full-width half-maximum. In situ  
557 measurements were performed between 10:00 and 14:00 h ART time (UTC 03:00), with the  
558 instrument positioned at a nadir view 50 cm above the surface. The upwelling light reflected  
559 from a 50 cm x 50 cm white reference material with 99% reflectance, was recorded before  
560 each canopy measurement allowing data acquisition during variable sky conditions. The  
561 integration time was adjusted to avoid saturation of the white signal and each  
562 measurement was the average of five successive scans. The measurements were  
563 homogeneously distributed over the plot to reduce border effects. Measurements were  
564 collected on 01/17/2020 (vegetative stage), 01/28/2020 (flowering); and 02/18/2020 (grain-  
565 filling stage). A typical outlier control based on standard deviation was implemented on  
566 each canopy spectral reflectance raw data.

567 Twenty-nine vegetation indices were selected based on the range of available wavelengths  
568 and their applications. The selected indices, their formulas, and type of applications are  
569 shown in Supplementary Figure S1.

570 Each vegetation index was evaluated for each treatment per genotype combination. Only  
571 those that differed significantly ( $P < 0.05$ ) between genotypes are discussed. Data analysis  
572 was conducted in R using the aov function and the post-hoc test was performed using the  
573 agricolae-package (Mendiburu, 2010).

574

#### 575 Statistical analyses

576 A t-test was used for the comparison of genotypes evaluated in the greenhouse experiment,  
577 whereas ANOVA was used to assess the effect of treatments (control, waterlogging, and  
578 defoliation), genotypes (line or hybrid, control or transgenic), and their interaction on the  
579 evaluated traits in greenhouse and field experiments. Differences across means were  
580 analyzed by a Tukey test (Supplementary Table S2). Principal components analyses (PCA)  
581 were used to evaluate the correlation among traits for the different genotypes and  
582 experiments, as well as for the vegetation indices (Figure 8 and Supplementary Figure S1).

583

#### 584 Accession numbers

585 Accession numbers of the genes evaluated in this work are available in Supplementary Table

586 S1

587

588 **Acknowledgements**

589 We thank Silvia Lede for her professional assistance in the procurement of CONABIA and  
590 INASE (Ministry of Agriculture) permits. We are very grateful for the technical assistance  
591 provided by Mr. Manuel Franco.

592 **Legends to Figures**

593 **Figure 1. Transgenic plants expressing *HaHB11* exhibit enhanced waterlogging tolerance**  
594 **compared with their B73 controls in the greenhouse**

595 Illustrative picture of maize plants subjected to waterlogging during 18 days (A). Total leaf  
596 area (B) and root biomass (D) after 18 days of waterlogging. Stomatal conductance after 7  
597 days of treatment (C). Root length after 10 and 18 days of waterlogging treatment plus 1  
598 week of recovery (E). Total leaf area at silking (F), stem surface (G), total biomass (H), green  
599 leaf area (I), number of nodal roots (J), grain weight (K), grain number (L) and yield (M).  
600 Illustrative pictures of cobs at harvest of control (C), and transgenic events (E2 and E3) in  
601 B73 background (N). Data represent means  $\pm$  SEM of at least 4 biological replicates.  
602 Asterisks indicate significant differences respect to the control genotype (\* for  $P < 0.05$  and  
603 \*\* for  $P < 0.01$ ). Bottom: codes used in all the illustrations.

604

605 **Figure 2. Field-grown transgenic plants expressing *HaHB11* tolerate better waterlogging**  
606 **than their B73 controls**

607 Illustrative picture of waterlogging treatment in the field (left, A) and plants placed on soil  
608 after treatment (right, A). Xylem vessels per transversal root cuts (B) and image of the  
609 stained cross sections of control and E3 transgenic plants (C), after 2 weeks of waterlogging.  
610 Light interception and green leaf area during the life cycle (D, E). Ear leaf green leaf index,  
611 100 days after sowing measured as chlorophyll/carotenoid index (CCI, F). Nodal roots  
612 number (G), stem surface (H), total biomass (I), harvest index (J), grain number and yield (K,  
613 L) of plants at harvest. Data represent means  $\pm$  SEM of at least 3 biological replicates.  
614 Asterisks indicate significant differences respect to the control genotype (\* for  $P < 0.05$  and  
615 \*\* for  $P < 0.01$ ).

616

617 **Figure 3. *HaHB11* transgenic hybrids tested in the greenhouse, exhibited delayed leaf**  
618 **senescence and greater yield than controls in standard growth conditions and after**  
619 **defoliation**

620 Upper panel: Illustrative photograph of B73 x Mo17 hybrids plants and their cobs (A). Total  
621 biomass (B). Senescence during grain filling (C). Grain number (D) and yield (E) at the end of  
622 life cycle. Plants were grown in normal conditions. Lower panel: Total leaf area of plants  
623 before (F, light green), and after defoliation (F, dark green). Total biomass, grain number



624 and yield of defoliated plants at harvest (G, H, I). Data represent means  $\pm$  SEM of at least 4  
625 biological replicates. Asterisks indicate significant differences respect to the control  
626 genotype (\* for  $P < 0.05$  and \*\* for  $P < 0.01$ ).

627

628 **Figure 4. Transgenic hybrids expressing *HaHB11* showed improved performance during**  
629 **waterlogging stress and after recovery than controls in the greenhouse.**

630 Illustrative image of hybrid controls (HC) and transgenic events (HE2 and HE3) after two  
631 weeks of waterlogging treatment (A). Root volume (B), xylem vessels per pith area (C), and  
632 root biomass (E). Illustrative photograph of roots stained during one hour with methylene  
633 blue, taken 2 weeks after initiating waterlogging treatment (D). Chlorophyll content of the  
634 5<sup>th</sup> leaf after 14 days of waterlogging treatment (F). Illustrative picture of vascular bundles in  
635 transversal sections of stems. Vascular bundles are marked with a pink cross (G, H).  
636 Phenotype of maize plants subjected to 14 days of waterlogging, and then grown in normal  
637 conditions until harvest. Individual leaf area from leaf 5 to 20 (I). Total nodal roots and  
638 representative photograph of the plants (J, K). Green leaf area of plants at the end of grain  
639 filling (L). Total biomass and yield at harvest (M, N). Data represent means  $\pm$  SEM of at least  
640 4 biological replicates. Asterisks indicate significant differences respect to the control  
641 genotype (\* for  $P < 0.05$  and \*\* for  $P < 0.01$ ).

642

643 **Figure 5. Field-grown transgenic hybrids carrying *HaHB11* exhibited a better performance**  
644 **than their controls grown in standard conditions and after waterlogging or defoliation**  
645 **treatments.**

646 Transversal cuts of adventitious roots, 12 days after initiating waterlogging treatment;  
647 samples were taken at 4.5 cm from the root tip (from 6-8 cm length roots), stained with  
648 safranin-fast green and captured with white light (A), or epifluorescence (B). Illustrative  
649 picture of roots on 7 days after the waterlogging treatment, stained with NBT (C). Number  
650 of xylem vessels per pith area in stems of plants waterlogged during 14 days (D). Phenotype  
651 of plants grown in normal conditions (S), defoliated 15 days after silking, or (D) subjected to  
652 14 days of waterlogging (W). Individual leaf area (from leaf 6 to 16, E). Vegetative biomass,  
653 grain number and yield of plants at harvest (F, H, J). Illustrative photograph of control  
654 hybrids c (HC) and two transgenic events (HE2, HE3) on 100 days after sowing (G).  
655 Representative picture of ears (HC, HE2, HE3) after different treatments (I). Arrow heads in

656 A point at tissue damage on the pith. Data represents means  $\pm$  SEM of at least 3 biological  
657 replicates. Asterisks indicate significant differences respect to the control genotype (\* for  
658  $P < 0.05$  and \*\* for  $P < 0.01$ ).

659

660 **Figure 6. Transgenic HaHB11 hybrids showed differential expression of genes related with**  
661 **waterlogging tolerance and carbohydrate contents**

662 A. Transcript levels of *ADH*, *G6PI*, *GAPDH*, *INV2*, *PGK*, *MS1*, *AP2*, and *HMT* genes involved in  
663 waterlogging response in *HaHB11* transgenic roots of the control (HC) and transgenic  
664 hybrids (HE2 and HE3), evaluated one day after initiating waterlogging treatment (left  
665 panel), or after 4, 6, and 12 days of treatment (right panel). B. Sucrose and starch contents  
666 before or after waterlogging treatment in leaves and roots of the control (HC) and  
667 transgenic hybrids (HE2 and HE3). All the values were normalized with endogenous *ACTIN*  
668 and then with the one obtained in the control, arbitrary assigned a value of one. The ID  
669 codes for the tested genes are listed in Supplementary Table S1. Each point is the average of  
670 four plants and error bars represent standard error of the mean (SEM)  $\times$  2. Asterisks  
671 indicate significant differences respect to the control genotype (\* for  $P < 0.05$  and \*\* for  
672  $P < 0.01$ ).

673

674 **Figure 7. Vegetation indices computing spectral data are able to discriminate genotypes**  
675 **and treatments.**

676 Radar plots showing significantly different values of VIs between genotypes for standard  
677 and defoliation treatments. Black line: control genotype. Light grey and grey lines: E2 and E3  
678 genotypes, respectively. Background colors indicate the applicability of the VIs. Green:  
679 chlorophyll, pink: water stress, light pink: biomass.

680

681 **Figure 8. The beneficial effects conferred by HaHB11 to maize plants are statistically**  
682 **robust**

683 A and B. Principal component analyses (PCA) performed using all the data presented in this  
684 manuscript. C. Summary of the differential traits assessed between transgenic and control  
685 maize plants at the vegetative stage (V3) subjected to waterlogging. D. Summary of the  
686 differential traits assessed between transgenic and control maize plants at harvest after

687 different treatments. Circles indicate (i) plants grown in control (blue) or waterlogging  
688 (green) conditions, and (ii) plants exposed to defoliation (orange).

## References

- Abiko T, Kotula L, Shiono K, Malik AI, Colmer TD, Nakazono M (2012) Enhanced formation of aerenchyma and induction of a barrier to radial oxygen loss in adventitious roots of *Zea mizcaraguensis* contribute to its waterlogging tolerance as compared with maize (*Zea mays* ssp. *mays*). *Plant Cell & Environment* 35, 1618–1630.
- Andrade FH, Vega C, Uhart S, Cirilo A, Cantarero M, Valentinuz O. (1999) Kernel number determination in maize. *Crop Science* 39, 453-459.
- Arce AL, Raineri J, Capella M, Cabello JV, Chan RL. (2011) Uncharacterized conserved motifs outside the HD-Zip domain in HD-Zip subfamily I transcription factors; a potential source of functional diversity. *BMC Plant Biology* 11, 42.
- Arias C, Montero Bulacio E, Rigalli N, Romagnoli M, Curin F, González FG, Otegui ME, Portapila M (2021) Ability of in situ canopy spectroscopy to differentiate genotype by environment interaction in wheat. *International Journal of Remote Sensing* 42, 3660-3680.
- Arora K, Panda KK, Mittal S, Mallikarjuna M G, Rao AR, Dash PK, Thirunavukkarasu N. (2017) RNAseq revealed the important gene pathways controlling adaptive mechanisms under waterlogged stress in maize. *Scientific Reports* 7, 1-12.
- Bailey-Serres J, Fukao T, Gibbs DJ, Holdsworth MJ, Lee SC, Licausi F, Perata P, Voesenek LA, van Dongen JT. (2012a) Making sense of low oxygen sensing. *Trends in Plant Science* 17, 129-138.
- Bailey-Serres J, Lee SC, Brinton E. (2012b) Waterproofing crops: effective flooding survival strategies. *Plant Physiology* 160, 1698-709.
- Bailey-Serres J, Voesenek L. (2008) Flooding stress: acclimations and genetic diversity. *Annual Review of Plant Biology* 59, 313-339.
- Bailey-Serres J, Voesenek LA. (2010) Life in the balance: a signaling network controlling survival of flooding. *Current Opinion in Plant Biology* 13, 489-494.
- Battaglia M, Lee C, Thomason W, Fike J, Sadeghpour A. (2019) Hail Damage Impacts on Corn Productivity: A Review. *Crop Science* 59, 1-14.
- Borrás L, Slafer GA, Otegui ME. (2004) Seed dry weight response to source–sink manipulations in wheat, maize and soybean: a quantitative reappraisal. *Field Crops Research* 86, 131-146.

Bramley H, Turner, DW, Tyerman SD, Turner NC. (2007) Water Flow in the Roots of Crop Species: The Influence of Root Structure, Aquaporin Activity, and Waterlogging, *Advances in Agronomy* 96, 133-196.

Cabello JV, Giacomelli JI, Piattoni CV, Iglesias AA, Chan RL. (2016) The sunflower transcription factor HaHB11 improves yield, biomass and tolerance to flooding in transgenic *Arabidopsis* plants. *Journal of Biotechnology* 222, 73-83.

Cerrudo AA, Di Matteo JA, Fernandez E, Robles M, Olmedo Pico L, Andrade FH. (2013) Yield components of maize as affected by short shading periods and thinning. *Crop and Pasture Sciences* 64, 580-587.

Chan RL, Trucco F, Otegui ME. (2020) Why are second-generation transgenic crops not yet available in the market? *Journal of Experimental Botany* 71, 6876-6880.

Chen K, Camberato JJ, Tuinstra MR, Kumudinib SK, Tollenaar M, Vyn TJ. (2016) Genetic improvement in density and nitrogen stress tolerance traits over 38 years of commercial maize hybrid release. *Field Crops Research* 196, 438–451.

Curin F, Severini AD, González FG, Otegui ME. (2020) Water and radiation use efficiencies in maize: Breeding effects on single-cross Argentine hybrids released between 1980 and 2012, *Field Crops Research* 246, 107683

de San Celedonio RP, Abeledo LG, Mantese AI, Miralles DJ (2017) Differential root and shoot biomass recovery in wheat and barley with transient waterlogging during preflowering. *Plant Soil* 417, 481–498.

Du H, Zhu J, Su H, Huang M, Wang H, Ding S, Zhang B, Luo A, Wei S, Tian X. (2017) Bulk segregant RNA-Seq reveals differential expression and SNPs of candidate genes associated with waterlogging tolerance in maize. *Frontiers in Plant Science* 8, 1022.

Duvik DN, Smith, JSC, Cooper M. (2004) Long-Term Selection in a Commercial Hybrid Maize Breeding Program. *Plant Breeding Review* 24, 109-152.

García-Martínez H, Flores-Magdaleno H, Ascencio-Hernández R, Khalil-Gardezi A, Tijerina-Chávez L, Mancilla-Villa OR, Vázquez-Peña MA. (2020) Corn Grain Yield Estimation from Vegetation Indices, Canopy Cover, Plant Density, and a Neural Network Using Multispectral and RGB Images Acquired with Unmanned Aerial Vehicles. *Agriculture* 10, 277.

González FG, Rigalli N, Miranda PV, Romagnoli M, Ribichich KF, Trucco F, Portapila M, Otegui ME, Chan RL. (2020) An Interdisciplinary Approach to Study the Performance of Second-

generation Genetically Modified Crops in Field Trials: A Case Study With Soybean and Wheat Carrying the Sunflower HaHB4 Transcription Factor. *Frontiers in Plant Science* 11, 178.

Hirabayashi Y, Tanoue M, Sasaki O, Zhou X, Yamazaki D. (2021) Global exposure to flooding from the new CMIP6 climate model projections. *Scientific Reports* 11, 3740.

Kaur G, Vikal Y, Kaur L, Kalia A, Mittal A, Kaur D, Yadav I. (2021) Elucidating the morpho-physiological adaptations and molecular responses under long-term waterlogging stress in maize through gene expression analysis. *Plant Science* 304, 110823.

Lmers L.P, Govers LL, Janssen IC, Geurts JJ, Van der Welle ME, Van Katwijk MM, Van der Heide T, Roelofs JG, Smolders AJ. (2013) Sulfide as a soil phytotoxin—a review. *Frontiers in Plant Science* 4, 268.

Li C, Liu D, Lin Z., Guan B, Liu D, Yang L, Deng X, Mei F, Zhou Z. (2019) Histone acetylation modification affects cell wall degradation and aerenchyma formation in wheat seminal roots under waterlogging. *Plant Growth Regulation* 87, 149–163.

Loreti E, van Veen H, Perata P. (2016) Plant responses to flooding stress. *Current Opinion in Plant Biology* 33, 64-71.

Mendiburu F. (2010) *Agricolae: Statistical Procedures for Agricultural Research*. R package version. 1, 1-8.

Montgomery EC. (1911) Correlation studies in corn. In *Nebraska Agric. Exp. Stn. Annu. Rep.*, 24, 108-159.

Munaro EM, D'Andrea KE, Otegui ME, Cirilo AG, Eyh rabide GH. (2011) Heterotic response for grain yield and ecophysiological related traits to nitrogen availability in maize. *Crop Science* 51, 1172-1187.

Pedersen O, Perata P, Voeselek LACJ. (2017) Flooding and low oxygen responses in plants. *Functional Plant Biology* 44: iii–vi.

Perotti MF, Ribone PA, Chan RL. (2017) Plant transcription factors from the Homeodomain-Leucine Zipper family I. Role in development and stress responses. *IUBMB Life* 69, 280-289.

Rajcan I, Tollenaar M. (1999) Source: sink ratio and leaf senescence in maize: II. Nitrogen metabolism during grain filling. *Field Crops Research* 60, 255-265.

Raineri J, Campi M, Chan RL, Otegui ME. (2019) Maize expressing the sunflower transcription factor HaHB11 has improved productivity in controlled and field conditions. *Plant Science* 287, 110185.

Rajhi I, Yamauchi T, Takahashi H, Nishiuchi S, Shiono K, Watanabe R, Mliki A, Nagamura Y, Tsutsumi N, Nishizawa NK, Nakazono M. (2011) Identification of genes expressed in maize root cortical cells during lysigenous aerenchyma formation using laser microdissection and microarray analyses. *New Phytologist* 190, 351-368.

Reynolds MP, Lewis JM, Ammar K, Basnet BR, Crespo-Herrera L, Crossa J, Dhugga KS, Dreisigacker S, Juliana P, Karwat H, Kishii M, Krause MR, Langridge P, Lashkari A, Mondal S, Payne T, Pequeno D, Pinto F, Sansaloni C, Schulthess U, Singh RP, Sonder K, Sukumaran S, Xiong W, Braun HJ. (2021) Harnessing translational research in wheat for climate resilience. *Journal of Experimental Botany* 72, 5134-5157.

Sadras V, Alston J, Aphalo P, Connor D, Denison RF, Fischer T, Gray R, Hayman P, Kirkegaard J, Kirchmann H, Kropff M, Lafitte HR, Langridge P, Lenne J, Mínguez JI, Passioura J, Porter JR, Reeves T, Rodriguez D, Ryan M, Villalobos FJ, Wood D. (2020). Chapter Four - Making science more effective for agriculture. Donald L. Sparks (Ed), *Advances in Agronomy*, Academic Press, Volume 163, 153-177.

Sasidharan R, Hartman S, Liu Z, Martopawiro S, Sajeev N, van Veen H, Yeung E, Voeselek LA. (2018). Signal dynamics and interactions during flooding stress. *Plant Physiology* 176, 1106-1117.

Schneider CA, Rasband WS, Eliceiri KW. (2012) NIH Image to ImageJ: 25 years of image analysis. *Nature Methods* 9, 671–675.

Setter TL, Waters I, Sharma SK, Singh KN, Kulshreshtha N, Yaduvanshi NP, Ram PC, Singh BN, Rane J, McDonald G, et al (2009) Review of wheat improvement for waterlogging tolerance in Australia and India: the importance of anaerobiosis and element toxicities associated with different soils. *Annals of Botany* 103, 221–235.

Tollenaar M, Wu J. (1999) Yield improvement in temperate maize is attributable to greater stress tolerance. *Crop Science* 39, 1597-1604.

Troyer F. (1999). Background of U.S. hybrid corn. *Crop Science* 39, 601–626.

Voeselek LACJ, Bailey-Serres J. (2015) Flood adaptive traits and processes: an overview. *New Phytologist* 206, 57-73.

Voeselek L, Sasidharan R. (2013) Ethylene—and oxygen signalling—drive plant survival during flooding. *Plant Biology* 15, 426-435.

Voesenek LA, Sasidharan R, Visser EJ, Bailey-Serres J. (2016) Flooding stress signaling through perturbations in oxygen, ethylene, nitric oxide and light. *New Phytologist* 209, 39-43.

Watanabe K, Takahashi H, Sato S, Nishiuchi S, Omori F, Malik AI, Nakazono M. (2017) A major locus involved in the formation of the radial oxygen loss barrier in adventitious roots of teosinte *Zea nicaraguensis* is located on the short-arm of chromosome 3. *Plant, Cell & Environment* 40, 304-316.

Yamauchi T, Colmer TD, Pedersen O, Nakazono M. (2018) Regulation of root traits for internal aeration and tolerance to soil waterlogging-flooding stress. *Plant Physiology* 176, 1118-1130.

Zaidi PH, ManiSelvan P, Sultana R, Srivastava A, Singh AK, Srinivasan G, Singh RP, Singh PP. (2007b) Association between line per se and hybrid performance under excessive soil moisture stress in tropical maize (*Zea mays* L.) *Field Crops Research* 101, 117-126.

Zaidi PH, Rafique S. (2003) Response of maize (*Zea mays* L.) genotypes to excess soil moisture stress: Morpho-physiological effects and basis of tolerance. *European Journal of Agronomy* 19, 383-399.

Zaidi PH, Rafique S, Rai PK, Singh NN, Srinivasan G. (2004) Tolerance to excess moisture in maize (*Zea mays* L.): Susceptible crop stages and identification of tolerant genotypes *Field Crops Research* 90, 189-202.

Zou X, Jiang Y, Liu L, Zhang Z, Zheng Y. (2010) Identification of transcriptome induced in roots of maize seedlings at the late stage of waterlogging. *BMC Plant Biology* 10, 1-16.
